# Supplementary material
Source: MDPI journal article supplement (https://www.mdpi.com/2073-445X/13/4/442)
Supplement: s1 [file s1]

**Table S1:** Sensitivity analysis of parameters.

| Parameter Code  | Description                                                                       | t-Stat  | p-Value | Rank |
|-----------------|-----------------------------------------------------------------------------------|---------|---------|------|
| r_CN2.mgt       | Initial SCS runoff curve number for moisture condition II                         | -7.0936 | 0.0000  | 3    |
| v_ALPHA_BF.gw   | Baseflow alpha-factor                                                             | 2.5997  | 0.0098  | 6    |
| v_SLSUBBSN.hru  | Average slope length                                                              | 7.2986  | 0.0000  | 2    |
| r_SOL_BD().sol  | Moist bulk density                                                                | 2.1517  | 0.0323  | 7    |
| v_HRU_SLP.hru   | Average slope steepness                                                           | -4.2847 | 0.0000  | 4    |
| r_SOL_K().sol   | Saturated hydraulic conductivity                                                  | -1.1215 | 0.2631  | 16   |
| r_SOL_AWC().sol | Available water capacity of the soil layer                                        | 8.8539  | 0.0000  | 1    |
| v_SMFMX.bsn     | Maximum melt rate for snow during year                                            | -0.7307 | 0.4656  | 20   |
| v_ESCO.hru      | Soil evaporation compensation factor                                              | 1.0426  | 0.2981  | 18   |
| v_SFTMP.bsn     | Snowfall temperature                                                              | -1.2761 | 0.2030  | 12   |
| v_TIMP.bsn      | Snow pack temperature lag factor                                                  | -0.5227 | 0.6016  | 22   |
| v_GW_REVAP.gw   | Groundwater “revap” coefficient                                                   | 1.0683  | 0.2863  | 17   |
| v_SURLAG.bsn    | Surface runoff lag time                                                           | -1.4430 | 0.1502  | 10   |
| v_SMTMP.bsn     | Snowmelt base temperature                                                         | 0.2304  | 0.8180  | 24   |
| r_SOL_ALB().sol | Moist soil albedo                                                                 | 0.0245  | 0.9805  | 28   |
| v_CH_K2.rte     | Effective hydraulic conductivity in main channel alluvium                         | -0.8329 | 0.4056  | 19   |
| v_REVAPMN.gw    | Threshold depth of water in the shallow aquifer for “revap” to occur              | -1.6061 | 0.1094  | 8    |
| v_SMFMN.bsn     | Minimum melt rate for snow during year                                            | -0.6275 | 0.5308  | 21   |
| v_CH_N2.rte     | Manning’s “n” value for the main channel                                          | -0.0949 | 0.9245  | 27   |
| v_EPCO.hru      | Plant uptake compensation factor                                                  | 1.2330  | 0.2186  | 13   |
| v_CANMX.hru     | Maximum canopy storage                                                            | 1.4665  | 0.1437  | 9    |
| v_GWQMN.gw      | Threshold depth of water in the shallow aquifer required for return flow to occur | 0.1889  | 0.8503  | 26   |
| v_GW_DELAY.gw   | Groundwater delay                                                                 | -0.2043 | 0.8383  | 25   |
| v_TLAPS.sub     | Temperature lapse rate                                                            | -1.3893 | 0.1659  | 11   |
| r_SOL_Z().sol   | Depth from soil surface to bottom of layer                                        | 1.1707  | 0.2427  | 15   |
| v_RCHRG_DP.gw   | Deep aquifer percolation fraction                                                 | -3.4829 | 0.0006  | 5    |
| r_BIOMIX.mgt    | Biological mixing efficiency                                                      | -1.1797 | 0.2392  | 14   |
| v_OV_N.hru      | Manning’s “n” value for overland flow                                             | -0.2843 | 0.7764  | 23   |

Notes: v\_ and r\_ represent the substitution of the given value for the current parameter value and the multiplication of the current parameter value by (1 + a given value), respectively.
